# Supplementary material
Source: MDPI journal article supplement (https://www.mdpi.com/2073-4468/4/2/71)
Supplement: s1 [file s1]

# Supplementart Materials

|      |                                                                                                                                                                                                                                                                                                      |
|------|------------------------------------------------------------------------------------------------------------------------------------------------------------------------------------------------------------------------------------------------------------------------------------------------------|
| DLK1 | AECFPACNPQNGFCEDDNVCRCHVGWQGGLCDQCVTSPGCLHLGCGEPGQCICITDGDWDELCDRDVACSSAPC<br>ANNGTCVSLDGGLYECSCAPGYSGKDCQKKDGPCVINGSPCQHGGTCVDDEGRASHASCLCPPGFSGNFCEIVANS<br>CTPNPCENDGVCTDIGGDFRCRCPAGFIDKTCRPVTNCASSPCQNGGTCLQHTQVSYECLCKPEFTGLTCVKKRAL<br>SPQQVTRLPSGYGLAYRLTPGVHELVPVQQPEHRILKVSMEKLNKKTPLLTEGQ |
| Fc   | EPKSCDKTHTCPPCPAPELLGGPSVFLFPPKPKDTLMISRTPEVTCVVVDVSHEDPEVKFNWYVDGVEVHNAKTKPR<br>EEQYNSTYRVVSVLTVLHQDWLNGKEYKCKVSNKALPAPIEKTISKAKGQPREPQVYTLPPSRDELTKNQVSLTCLVK<br>GFYPSDIAVEWESNGQPENNYKTPPVLDSDGSFFLYSKLTVDKSRWQQGNVFCFSVMHEALHNHYTQKSLSLSPGK                                                      |
| VH   | EB3 EVQLLESGGGLVQPGGSLRLSCAASGFTFSSYAMSWVRQAPGKLEWWSAISGSGGSTYYADSVKGRFTISRDNKNTLYLQMNSLRAEDTAVYYCAKSYRVFDYWGQGLTVVSS                                                                                                                                                                                |
| VL   | EB3 SSELTDQPAVSVALGQTVRITCQGDSLSRYYSWYQQKPGQAPVLIYGKNNRPSGIPDRFSGSSSGNTASLTITGAQAEADYYCNSSDPWPKVVFVGGGKLTVLG                                                                                                                                                                                         |

Figure S1. Aminoacid sequence of the scFv(EB3).

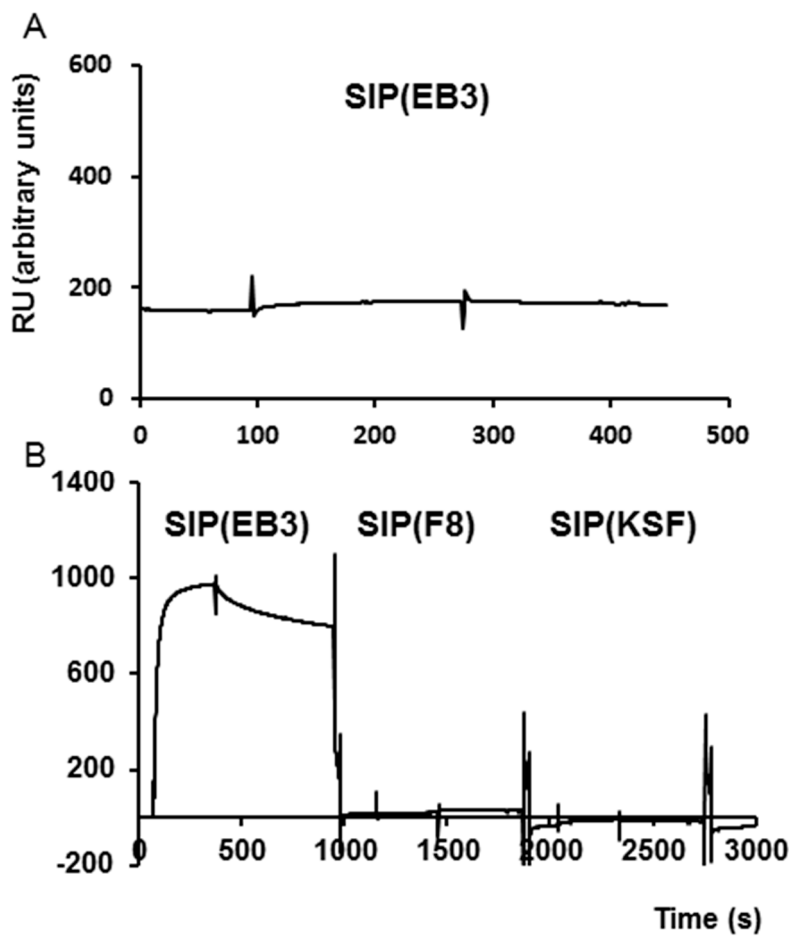

Figure S2. (A) BIAcore profile of SIP(EB3) against the extra domain A of fibronectin coated on the CM5 chip demonstrates absence of binding. (B) BIAcore profiles of SIP(EB3), SIP(F8) and SIP(KSF) antibodies against DLK1-Fc fusion protein coated on the CM5 chip, respectively.

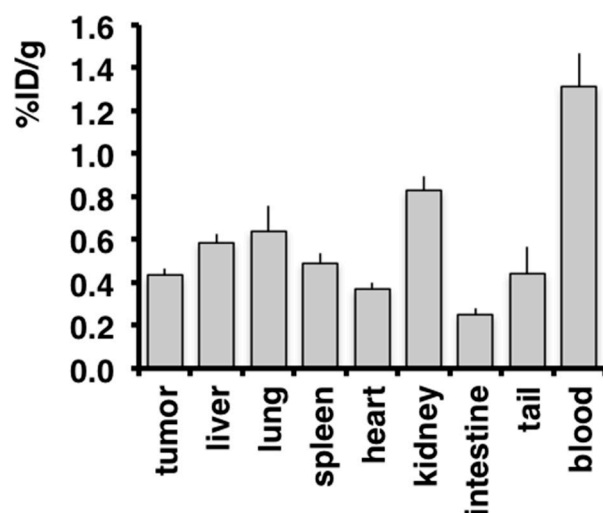

**Figure S3.** Radioiodinated preparation of SIP(EB3) was injected into nude mice, bearing subcutaneously-grafted U87 tumors. Twentyfour hours after intravenous administration, SIP(EB3) failed to localize to the neoplastic lesions *in vivo*.
